# Supplementary material for: Involvement of genes encoding ABI1 protein phosphatases in the response of Brassica napus L. to drought stress
Source: PubMed Central journal article supplement (PMC4486095; doi:10.1007/s11103-015-0334-x), 2015-06-10

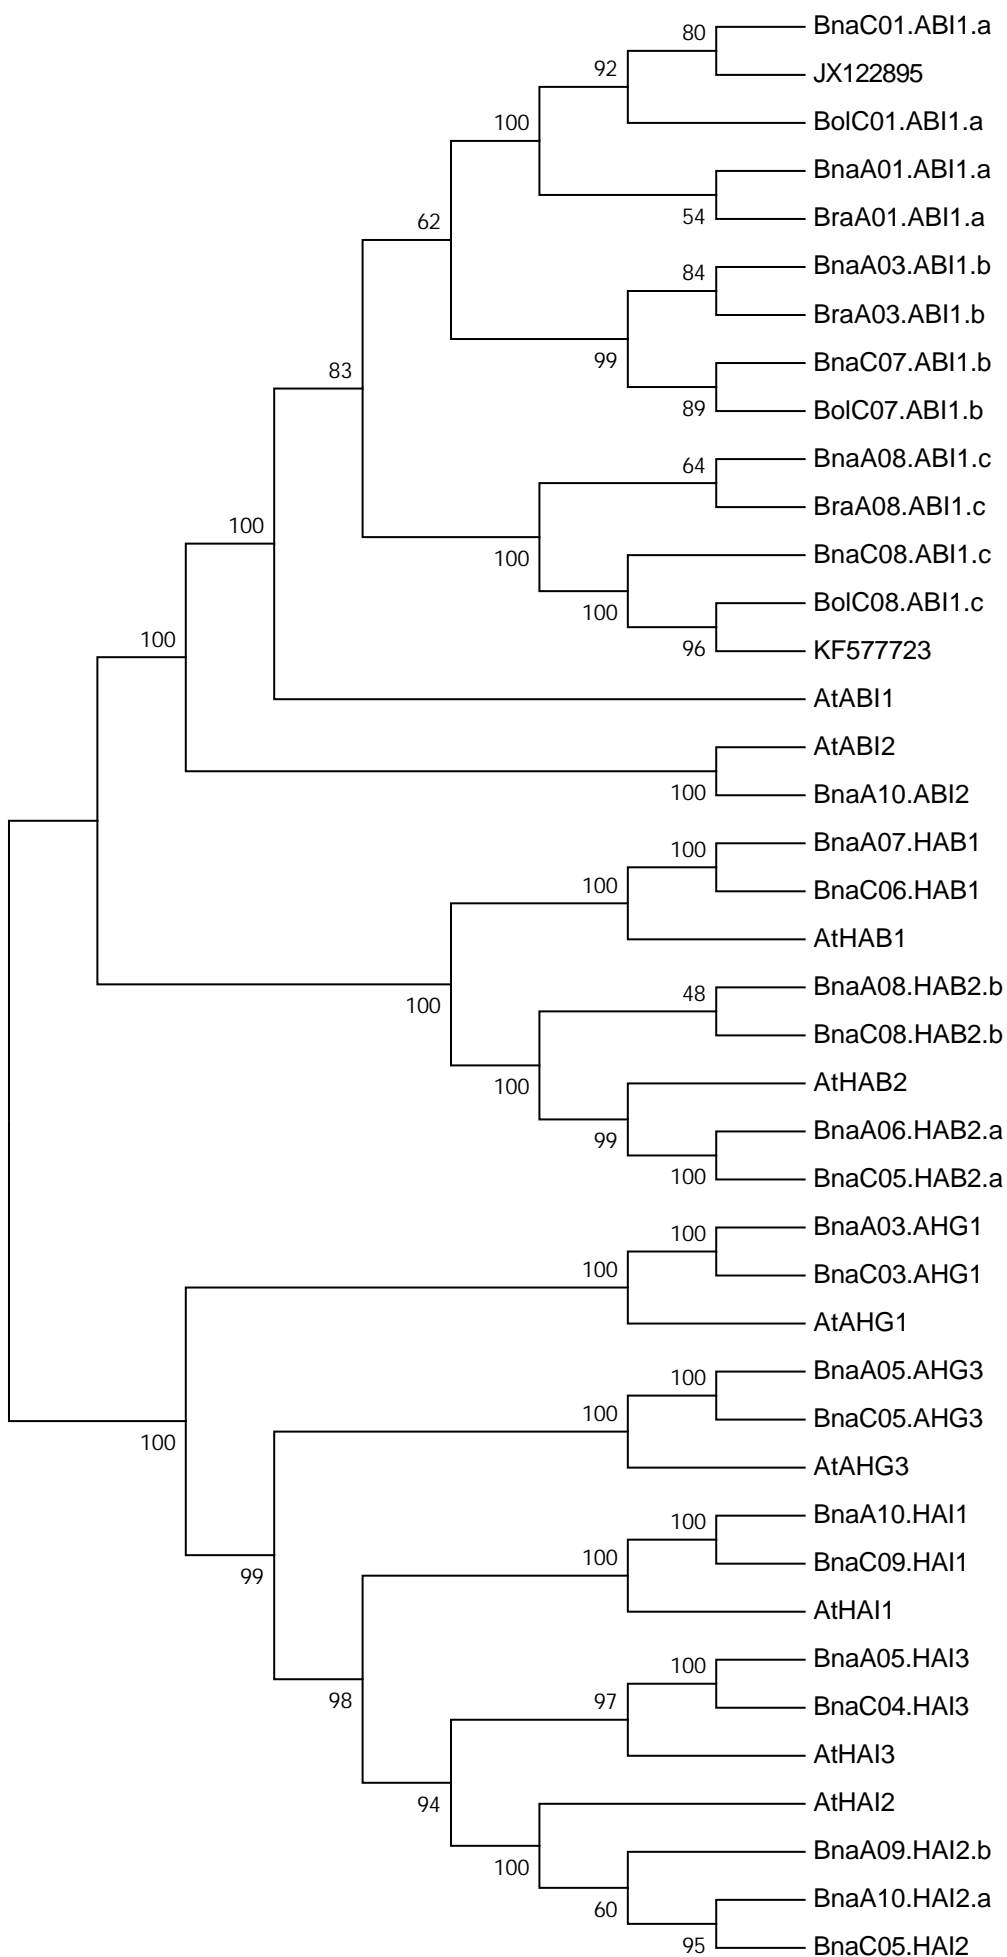

Supplement: 11103_2015_334_MOESM5_ESM.pdf [file 11103_2015_334_MOESM5_ESM.pdf]
